# Supplementary material
Source: publisher figshare collection journal article supplement (https://acs.figshare.com/ndownloader/files/8545429)
Supplement: Supplementary file 1 [file 8545429]

---

**Supply chain optimization of integrated glycerol biorefinery: GlyThink  
model development and application**

---

Supporting Information for publication

Table S1: Market demands for each product, corresponding main assumptions and respective references.

| Products                                      | Markets        | Demand per market<br>(10 <sup>3</sup> ton/year) | Assumptions                                                                                                                                                                        | Refs          |
|-----------------------------------------------|----------------|-------------------------------------------------|------------------------------------------------------------------------------------------------------------------------------------------------------------------------------------|---------------|
| <b>PHB</b>                                    | Germany        | 8.82×10 <sup>3</sup>                            | Potential addressable market is as replacement of polypropylene (PP) and polyethylene (PE)                                                                                         | (1)(2)        |
|                                               | France         | 4.97×10 <sup>3</sup>                            |                                                                                                                                                                                    |               |
|                                               | Italy          | 3.37×10 <sup>3</sup>                            |                                                                                                                                                                                    |               |
|                                               | United Kingdom | 2.64×10 <sup>3</sup>                            |                                                                                                                                                                                    |               |
|                                               | Spain          | 2.60×10 <sup>3</sup>                            |                                                                                                                                                                                    |               |
| <b>Ethanol</b>                                | Germany        | 1.20×10 <sup>6</sup>                            | Bioethanol used as biofuel                                                                                                                                                         | (3)           |
|                                               | UK             | 7.89×10 <sup>2</sup>                            |                                                                                                                                                                                    |               |
|                                               | France         | 6.71×10 <sup>2</sup>                            |                                                                                                                                                                                    |               |
|                                               | Spain          | 2.96×10 <sup>2</sup>                            |                                                                                                                                                                                    |               |
|                                               | Italy          | 2.84×10 <sup>2</sup>                            |                                                                                                                                                                                    |               |
| <b>Lactic acid</b>                            | Germany        | 5.36×10 <sup>3</sup>                            | Production of PLA, with an addressable market as replacement of polystyrene (PS), polypropylene (PP) and PET → this market represents 39% of the total market of lactic acid       | (1)<br>(2)(4) |
|                                               | France         | 3.02×10 <sup>3</sup>                            |                                                                                                                                                                                    |               |
|                                               | Italy          | 2.05×10 <sup>3</sup>                            |                                                                                                                                                                                    |               |
|                                               | UK             | 1.60×10 <sup>3</sup>                            |                                                                                                                                                                                    |               |
|                                               | Spain          | 1.85×10 <sup>3</sup>                            |                                                                                                                                                                                    |               |
| <b>Succinic acid</b>                          | UK             | 2.56×10 <sup>2</sup>                            | Addressable markets are given by plasticizers, BDO, polyester polyols, alkyl resins, PBS and PBST                                                                                  | (2),(5,6)     |
|                                               | Spain          | 2.52×10 <sup>2</sup>                            |                                                                                                                                                                                    |               |
|                                               | Germany        | 8.54×10 <sup>2</sup>                            |                                                                                                                                                                                    |               |
|                                               | Italy          | 4.81×10 <sup>2</sup>                            |                                                                                                                                                                                    |               |
|                                               | France         | 3.26×10 <sup>2</sup>                            |                                                                                                                                                                                    |               |
| <b>1,3-propanediol</b>                        | Germany        | 1.22×10 <sup>3</sup>                            | For the production of PTT, which is a biodegradable replacement for PET                                                                                                            | (1)(2)        |
|                                               | France         | 6.87×10 <sup>2</sup>                            |                                                                                                                                                                                    |               |
|                                               | Italy          | 4.66×10 <sup>2</sup>                            |                                                                                                                                                                                    |               |
|                                               | UK             | 3.65×10 <sup>2</sup>                            |                                                                                                                                                                                    |               |
|                                               | Spain          | 3.60×10 <sup>2</sup>                            |                                                                                                                                                                                    |               |
| <b>1,2-propanediol<br/>(propylene glycol)</b> | Germany        | 4.90×10 <sup>2</sup>                            | Top-5 major propylene glycol producers                                                                                                                                             | (7)           |
|                                               | Netherlands    | 80                                              |                                                                                                                                                                                    |               |
|                                               | France         | 80                                              |                                                                                                                                                                                    |               |
|                                               | Spain          | 95                                              |                                                                                                                                                                                    |               |
|                                               | Belgium        | 50                                              |                                                                                                                                                                                    |               |
| <b>H<sub>2</sub></b>                          | Germany        | 2.44×10 <sup>6</sup>                            | 16% of the world demand corresponds to western Europe, top-5 distribution based on the GDP of the individual countries                                                             | (8,9)         |
|                                               | France         | 1.78×10 <sup>6</sup>                            |                                                                                                                                                                                    |               |
|                                               | Netherlands    | 5.54×10 <sup>5</sup>                            |                                                                                                                                                                                    |               |
|                                               | Belgium        | 3.36×10 <sup>5</sup>                            |                                                                                                                                                                                    |               |
|                                               | Austria        | 2.77×10 <sup>5</sup>                            |                                                                                                                                                                                    |               |
| <b>Acrolein</b>                               | Bulgaria       | 9.15×10 <sup>2</sup>                            | Addressable market is acrylic acid and the demand was given in total for eastern and western Europe, the top-5 distribution was given based on the GDP of the individual countries | (8,10,11)     |
|                                               | Germany        | 6.35×10 <sup>2</sup>                            |                                                                                                                                                                                    |               |
|                                               | Belgium        | 3.20×10 <sup>2</sup>                            |                                                                                                                                                                                    |               |
|                                               | France         | 2.75×10 <sup>2</sup>                            |                                                                                                                                                                                    |               |
|                                               | Czech Republic | 55                                              |                                                                                                                                                                                    |               |
| <b>Propionic acid</b>                         | Germany        | 67.5                                            | Propionic acid demand in the world, where 16% is for Europe. GDP was used to find the top-5 consumers                                                                              | (8,12)        |
|                                               | France         | 49.3                                            |                                                                                                                                                                                    |               |
|                                               | Netherlands    | 15                                              |                                                                                                                                                                                    |               |
|                                               | Belgium        | 92.7                                            |                                                                                                                                                                                    |               |
|                                               | Austria        | 7.65                                            |                                                                                                                                                                                    |               |
| <b>n-Butanol</b>                              | Germany        | 2.19×10 <sup>2</sup>                            | European demand of n-butanol                                                                                                                                                       | (13–15)       |
|                                               | UK             | 1.58×10 <sup>2</sup>                            |                                                                                                                                                                                    |               |
|                                               | France         | 1.65×10 <sup>2</sup>                            |                                                                                                                                                                                    |               |
|                                               | Italy          | 35.3                                            |                                                                                                                                                                                    |               |
|                                               | Spain          | 82                                              |                                                                                                                                                                                    |               |
| <b>Isobutanol</b>                             | Belgium        | 94.7                                            | Isobutanol is used as a precursor of terephthalic acid, which is a precursor of PE. The same distribution as the one for plastics in Europe                                        | (16,17)       |
|                                               | Portugal       | 49.4                                            |                                                                                                                                                                                    |               |
|                                               | Spain          | 49.4                                            |                                                                                                                                                                                    |               |
|                                               | Poland         | 42.4                                            |                                                                                                                                                                                    |               |
|                                               | UK             | 35.3                                            |                                                                                                                                                                                    |               |

|                        |             |                      |                                                                                                                                                                                                                                                                                                                             |         |
|------------------------|-------------|----------------------|-----------------------------------------------------------------------------------------------------------------------------------------------------------------------------------------------------------------------------------------------------------------------------------------------------------------------------|---------|
| <b>Epichlorohydrin</b> | Germany     | 1.58×10 <sup>2</sup> | Addressable market is the production of epoxy resins. For this, bisphenol A (BPA) is used along with epichlorohydrin. 30% of the consumption of BPA is for the production of epoxy resins. World demand of BPA and the respective percentage for Europe. Top-5 consumers of BPA assumed to be the same for epichlorohydrin. | (18–20) |
|                        | Netherlands | 1.42×10 <sup>2</sup> |                                                                                                                                                                                                                                                                                                                             |         |
|                        | Belgium     | 96.7                 |                                                                                                                                                                                                                                                                                                                             |         |
|                        | Spain       | 86.8                 |                                                                                                                                                                                                                                                                                                                             |         |
|                        | Italy       | 42.7                 |                                                                                                                                                                                                                                                                                                                             |         |

Table S2: Matrix of distances between the plant site and the markets.

| (km)            | Germany | France | Netherlands | Spain  | Italy  |
|-----------------|---------|--------|-------------|--------|--------|
| Germany         | 383.5   | 1032.7 | 467.3       | 2058.7 | 1376.3 |
| France          | 1032.7  | 529.5  | 853.9       | 1001.6 | 1298   |
| Italy           | 1376.3  | 1298   | 1621.9      | 1974.1 | 410    |
| UK              | 1471.5  | 1428   | 1017.3      | 2311.3 | 2472.5 |
| Spain           | 2058.7  | 1001.6 | 1753.9      | 471    | 1974.1 |
| The Netherlands | 467.3   | 853.9  | 131.4       | 1753.9 | 1621.9 |
| Belgium         | 543.2   | 658    | 224.7       | 1549.7 | 1467.2 |
| Austria         | 685.6   | 1308.4 | 1024.6      | 2242   | 933.9  |
| Bulgaria        | 1972.8  | 2390.9 | 2412.9      | 3270.6 | 1962.5 |
| Czech Republic  | 529.4   | 1313   | 932.4       | 2416.9 | 1371.1 |
| Poland          | 755.9   | 1710   | 1023.5      | 2716.8 | 3053.9 |
| Portugal        | 2397.3  | 1340.2 | 2092.6      | 477.8  | 2389.5 |

Table S3: Product prices, reference capacity and reference purchased capital investment.

| Product                    | Reference capacity (ton/year) | Purchased Capital Cost (MM\$) |
|----------------------------|-------------------------------|-------------------------------|
| Succinic acid (SA)         | 10200                         | 11.217 (21)                   |
| 1,3-propanediol (13pdo)    | 5500                          | 5.347 (21)                    |
| Propionic acid (PA)        | 6796                          | 4.747 (21)                    |
| Polyhydroxybutyrate (PHB)  | 3600                          | 15.020 (21)                   |
| 1,2-propanediol (12pdo)    | 7740                          | 4.713 (21)                    |
| Lactic acid (LA)           | 7931                          | 4.929 (21)                    |
| Isobutanol (Isob)          | 7300                          | 6.705 (21)                    |
| Hydrogen (H <sub>2</sub> ) | 659                           | 5.551 (21)                    |
| n-Butanol (BuOH)           | 3000                          | 5.202 (21)                    |
| Ethanol (EtOH)             | 5211                          | 8.227 (21)                    |
| Acrolein (Acro)            | 4870                          | 4.927 (21)                    |
| Epichlorohydrin (epi)      | 100000 (22)                   | 166 (23)                      |

1. E4tech (UK), Re-Cord, Wageningen-UR. From the Sugar Platform to biofuels and biochemicals -

- Final Report for the European Commission Directorate-General Energy [Internet]. London; 2015. Available from: [https://ec.europa.eu/energy/sites/ener/files/documents/EC\\_Sugar\\_Platform\\_final\\_report.pdf](https://ec.europa.eu/energy/sites/ener/files/documents/EC_Sugar_Platform_final_report.pdf)
2. Plastics - the Facts 2014/2015 [Internet]. 2015. Available from: <http://www.plastics.gl/market/plastics-the-facts-2014/>
  3. Stange K, Flach B, Lieberz S, Rondon M, Williams B, Teiken C. EU Biofuels Annual 2015. 2015.
  4. Lactic Acid Market worth \$3,577.5 Million & Polylactic Acid Market worth \$4,840.1 Million by 2019 [Internet]. [cited 2016 Nov 16]. Available from: <https://www.linkedin.com/pulse/lactic-acid-market-worth-35775-million-poly-lactic-48401-eileen-x-slovakia>
  5. Slovakia) W (Consultancy company based in. Determination of market potentials for selected platform chemicals [Internet]. Communication in Bratislava under the BioConSept project. 2013. Available from: <http://www.slideshare.net/Greenchemblog/bio-consept-ppt>
  6. Global Succinic Acid & Bio-Succinic Acid Market | Industry Analysis | Forecast 2015-2021 [Internet]. 2015. Available from: <http://www.slideshare.net/occamsresearch/succinic-acid-ppt>
  7. ICIS. Chemical Profile: Europe MPG [Internet]. 2014. Available from: <http://www.icis.com/resources/news/2014/09/19/9822039/chemical-profile-europe-mpg/>
  8. Statistics. Western Europe. Gross Domestic Product (GDP). 1970-2014.
  9. Freedonia. World Hydrogen - Industry Study with Forecasts for 2013 & 2018 [Internet]. 2010. Available from: <http://www.freedoniagroup.com/brochure/26xx/2605smwe.pdf>
  10. Amir A, Afshar N. Chemical Profile: Crude Acrylic acid [Internet]. 2014. Available from: [http://www.chemplan.biz/\(X\(1\)S\(r05csalpuogmwlo1c3mrhj4g\)\)/chemplan\\_demo/sample\\_reports/Crude\\_Acrylic\\_Acid\\_profile.pdf](http://www.chemplan.biz/(X(1)S(r05csalpuogmwlo1c3mrhj4g))/chemplan_demo/sample_reports/Crude_Acrylic_Acid_profile.pdf)
  11. Lee R. Whither Demand? - Growth in Prospect [Internet]. 2015. Available from: <http://www.slideshare.net/TecnonOrbichem/whither-demand-growth-in-prospect>
  12. Grand View Research. Global Propionic Acid Market By application Expected to reach USD 1.53 Billion by 2020. 2015.
  13. Guzman D. Green Chemicals Blog: Biobased market studies galore! [Internet]. 2013. Available from: <http://greenchemicalsblog.com/2013/06/06/biobased-market-studies-galore/>
  14. Guzman D. Cobalt, Rhodia to build n-butanol demo plant [Internet]. 2012 [cited 2016 Nov 15]. Available from: <http://www.icis.com/blogs/green-chemicals/2012/08/cobalt-rhodia-to-build-n-butanol/>
  15. List of European Countries by GDP. 2015.
  16. WP 8.1. Determination of market potential for selected platform chemicals. 2011.
  17. Global Isobutanol Market Set For Rapid Growth, To Reach Around USD 1,085.00 Million By 2020. 2016.

18. MarketResearchStore. Global Epichlorohydrin Market Is Set for Rapid Growth, To Reach Around 2,262.8 Kilo Tons By 2020 [Internet]. 2016. Available from: <http://www.marketresearchstore.com/news/global-epichlorohydrin-market-206>
19. Jong E De. Bio-based Chemicals Value Added Products from Biorefineries. A Rep Prep IEA Bioenergy-Task [Internet]. 2011;36. Available from: <http://www.qibebt.ac.cn/xwzx/kydt/201202/P020120223409482956847.pdf>
20. ICIS. European chemical profile: Bisphenol A [Internet]. 2011. Available from: <http://www.icis.com/resources/news/2011/05/09/9457899/european-chemical-profile-bisphenol-a/>
21. Gargalo CL, Cheali P, Posada JA, Gernaey K V., Sin G. Economic risk assessment of early-stage designs for glycerol valorization in biorefinery concepts. *Ind Eng Chem Res*. 2015;
22. Chemicals-technology.com. Solvay Epichlorohydrin Plant, Thailand [Internet]. [cited 2016 Nov 1]. Available from: <http://www.chemicals-technology.com/projects/solvay-plant/>
23. Almena A, Martín M. Technoeconomic Analysis of the Production of Epichlorohydrin from Glycerol. *Ind Eng Chem Res* [Internet]. 2015;acs.iecr.5b02555. Available from: <http://pubs.acs.org/doi/10.1021/acs.iecr.5b02555>
